# Supplementary material for: The survival benefit of palliative gastrectomy and/or metastasectomy in gastric cancer patients with synchronous metastasis: a population-based study using propensity score matching and coarsened exact matching
Source: PubMed Central journal article supplement — J Cancer. 2019 Jan 1;10(3):602–10. doi: 10.7150/jca.28842 (PMC6360412; doi:10.7150/jca.28842), 2019-01-01
Supplement: jcav10p0602s1.pdf [file jcav10p0602s1.pdf]

Supplementary Table 1 Characteristics of the patients undergoing surgeries to both primary and metastatic tumors (SPM), patients undergoing gastrectomy only (GO), patients undergoing metastasectomy only (MO), and patients without surgery (NS) after propensity score matching and weighted by coarsened exact matching method

| Variable               | Propensity score matching cohort |             |             |             | <i>P</i> | Coarsened exact matching |
|------------------------|----------------------------------|-------------|-------------|-------------|----------|--------------------------|
|                        | SPM (%)                          | GO (%)      | MO (%)      | NS (%)      |          | method weighted cohort   |
|                        |                                  |             |             |             |          | <i>P</i>                 |
| <b>Age, years</b>      |                                  |             |             |             | 0.479    | 1.000                    |
| < 50                   | 106 (29.5%)                      | 94 (26.2%)  | 113 (31.5%) | 99 (27.6%)  |          |                          |
| 50–59                  | 87 (24.2%)                       | 98 (27.3%)  | 83 (23.1%)  | 79 (22.0%)  |          |                          |
| 60–69                  | 83 (23.1%)                       | 98 (27.3%)  | 90 (25.1%)  | 93 (25.9%)  |          |                          |
| ≥ 70                   | 83 (23.1%)                       | 69 (19.2%)  | 73 (20.3%)  | 88 (24.5%)  |          |                          |
| <b>Sex</b>             |                                  |             |             |             | 0.979    | 0.998                    |
| Male                   | 179 (49.9%)                      | 184 (51.3%) | 183 (51.0%) | 180 (50.1%) |          |                          |
| Female                 | 180 (50.1%)                      | 175 (48.7%) | 176 (49.0%) | 179 (49.9%) |          |                          |
| <b>Marriage status</b> |                                  |             |             |             | 0.649    | 0.999                    |
| Married                | 227 (63.2%)                      | 230 (64.1%) | 230 (64.1%) | 226 (63.0%) |          |                          |
| Widowed                | 28 (7.8%)                        | 37 (10.3%)  | 24 (6.7%)   | 29 (8.1%)   |          |                          |
| Other                  | 104 (29.0%)                      | 92 (25.6%)  | 105 (29.2%) | 104 (29.0%) |          |                          |
| <b>Race</b>            |                                  |             |             |             | 0.424    | 1.000                    |
| Non-Hispanic White     | 170 (47.4%)                      | 166 (46.2%) | 173 (48.2%) | 158 (44.0%) |          |                          |
| Non-Hispanic Black     | 42 (11.7%)                       | 60 (16.7%)  | 44 (12.3%)  | 44 (12.3%)  |          |                          |
| Hispanic               | 93 (25.9%)                       | 77 (21.4%)  | 90 (25.1%)  | 103 (28.7%) |          |                          |
| Other                  | 54 (15.0%)                       | 56 (15.6%)  | 52 (14.5%)  | 54 (15.0%)  |          |                          |
| <b>SEER region</b>     |                                  |             |             |             | 0.821    | 1.000                    |
| Mid-west               | 43 (12.0%)                       | 46 (12.8%)  | 45 (12.5%)  | 33 (9.2%)   |          |                          |

|                               |             |             |             |             |       |       |
|-------------------------------|-------------|-------------|-------------|-------------|-------|-------|
| Northeast                     | 62 (17.3%)  | 66 (18.4%)  | 58 (16.2%)  | 59 (16.4%)  |       |       |
| South                         | 67 (18.7%)  | 56 (15.6%)  | 64 (17.8%)  | 70 (19.5%)  |       |       |
| West                          | 187 (52.1%) | 191 (53.2%) | 192 (53.5%) | 197 (54.9%) |       |       |
| <b>Year of diagnosis</b>      |             |             |             |             | 0.136 | 1.000 |
| 2004–2006                     | 130 (36.2%) | 143 (39.8%) | 140 (39.0%) | 130 (36.2%) |       |       |
| 2007–2009                     | 114 (31.8%) | 108 (30.1%) | 88 (24.5%)  | 114 (31.8%) |       |       |
| 2010–2013                     | 115 (32.0%) | 108 (30.1%) | 131 (36.5%) | 115 (32.0%) |       |       |
| <b>Primary tumor location</b> |             |             |             |             | 0.092 | 1.000 |
| Upper one third               | 52 (14.5%)  | 56 (15.6%)  | 82 (22.8%)  | 59 (16.4%)  |       |       |
| Middle one third              | 35 (9.7%)   | 29 (8.1%)   | 40 (11.1%)  | 32 (8.9%)   |       |       |
| Lower one third               | 105 (29.2%) | 99 (27.6%)  | 64 (17.8%)  | 89 (24.8%)  |       |       |
| NOS                           | 167 (46.5%) | 175 (48.7%) | 173 (48.2%) | 179 (49.9%) |       |       |
| <b>Histology</b>              |             |             |             |             | 0.449 | 0.999 |
| Adenocarcinoma                |             |             |             |             |       |       |
| NOS                           | 219 (61.0%) | 226 (63.0%) | 214 (59.6%) | 217 (60.4%) |       |       |
| Mucinous                      |             |             |             |             |       |       |
| adenocarcinoma                | 9 (2.5%)    | 9 (2.5%)    | 5 (1.4%)    | 3 (0.8%)    |       |       |
| Signet ring cell carcinoma    | 131 (36.5%) | 124 (34.5%) | 140 (39.0%) | 139 (38.7%) |       |       |

Abbreviations: SEER, Surveillance, Epidemiology, and End Results; NOS, not otherwise specified.

Supplementary Table 2 Baseline demographic and clinicopathological characteristics of the patients in the sensitivity analyses

| Variable               | Number (%)    |             |             |             |              | P value |
|------------------------|---------------|-------------|-------------|-------------|--------------|---------|
|                        | All cohort    | SPM         | GO          | MO          | NS           |         |
| <b>Total</b>           | 5347 (100.0%) | 227 (4.2%)  | 554 (10.4%) | 373 (7.0%)  | 4193 (78.4%) |         |
| <b>Age, years</b>      |               |             |             |             |              | < 0.001 |
| < 50                   | 1351 (25.3%)  | 81 (35.7%)  | 147 (26.5%) | 154 (41.3%) | 969 (23.1%)  |         |
| 50–59                  | 1412 (26.4%)  | 59 (26.0%)  | 152 (27.4%) | 100 (26.8%) | 1101 (26.3%) |         |
| 60–69                  | 1539 (28.8%)  | 48 (21.1%)  | 166 (30.0%) | 73 (19.6%)  | 1252 (29.9%) |         |
| ≥ 70                   | 1045 (19.5%)  | 39 (17.2%)  | 89 (16.1%)  | 46 (12.3%)  | 871 (20.8%)  |         |
| <b>Sex</b>             |               |             |             |             |              | < 0.001 |
| Male                   | 3369 (63.0%)  | 105 (46.3%) | 343 (61.9%) | 141 (37.8%) | 2780 (66.3%) |         |
| Female                 | 1978 (37.0%)  | 122 (53.7%) | 211 (38.1%) | 232 (62.2%) | 1413 (33.7%) |         |
| <b>Marriage status</b> |               |             |             |             |              | 0.340   |
| Married                | 3415 (63.9%)  | 156 (68.7%) | 366 (66.1%) | 224 (60.1%) | 2669 (63.7%) |         |
| Widowed                | 321 (6.0%)    | 12 (5.3%)   | 33 (6.0%)   | 21 (5.6%)   | 255 (6.1%)   |         |
| Other                  | 1611 (30.1%)  | 59 (26.0%)  | 155 (28.0%) | 128 (34.3%) | 1269 (30.3%) |         |
| <b>Race</b>            |               |             |             |             |              |         |
| Non-Hispanic White     | 2667 (49.9%)  | 108 (47.6%) | 223 (40.3%) | 163 (43.7%) | 2173 (51.8%) | < 0.001 |
| Non-Hispanic Black     | 676 (12.6%)   | 22 (9.7%)   | 87 (15.7%)  | 48 (12.9%)  | 519 (12.4%)  |         |
| Hispanic               | 1273 (23.8%)  | 65 (28.6%)  | 140 (25.3%) | 106 (28.4%) | 962 (22.9%)  |         |
| Other                  | 731 (13.7%)   | 32 (14.1%)  | 104 (18.8%) | 56 (15.0%)  | 539 (12.9%)  |         |
| <b>SEER region</b>     |               |             |             |             |              | 0.137   |
| Mid-west               | 634 (11.9%)   | 27 (11.9%)  | 44 (7.9%)   | 49 (13.1%)  | 514 (12.3%)  |         |
| Northeast              | 963 (18.0%)   | 40 (17.6%)  | 97 (17.5%)  | 56 (15.0%)  | 770 (18.4%)  |         |

|                               |              |              |              |             |              |         |
|-------------------------------|--------------|--------------|--------------|-------------|--------------|---------|
| South                         | 819 (15.3%)  | 34 (15.0%)   | 87 (15.7%)   | 53 (14.2%)  | 645 (15.4%)  |         |
| West                          | 2931 (54.8%) | 126 (55.5%)  | 326 (58.8%)  | 215 (57.6%) | 2264 (54.0%) |         |
| <b>Year of diagnosis</b>      |              |              |              |             |              | < 0.001 |
| 2004–2006                     | 1354 (25.3%) | 72 (31.7%)   | 191 (34.5%)  | 114 (30.6%) | 977 (23.3%)  |         |
| 2007–2009                     | 1598 (29.9%) | 73 (32.2%)   | 166 (30.0%)  | 95 (25.5%)  | 1264 (30.1%) |         |
| 2010–2013                     | 2395 (44.8%) | 82 (36.1%)   | 197 (35.6%)  | 164 (44.0%) | 1952 (46.6%) |         |
| <b>Primary tumor location</b> |              |              |              |             |              | < 0.001 |
| Upper one third               | 1818 (34.0%) | 39 (17.2%)   | 90 (16.2%)   | 82 (22.0%)  | 1607 (38.3%) |         |
| Middle one third              | 543 (10.2%)  | 20 (8.8%)    | 59 (10.6%)   | 49 (13.1%)  | 415 (9.9%)   |         |
| Lower one third               | 910 (17.0%)  | 66 (29.1%)   | 165 (29.8%)  | 65 (17.4%)  | 614 (14.6%)  |         |
| NOS                           | 2076 (38.8%) | 102 (44.9%)  | 240 (43.3%)  | 177 (47.5%) | 1557 (37.1%) |         |
| <b>Tumor grade</b>            |              |              |              |             |              | < 0.001 |
| G1/G2                         | 924 (17.3%)  | 31 (13.7%)   | 90 (16.2%)   | 32 (8.6%)   | 771 (18.4%)  |         |
| G3/G4                         | 3370 (63.0%) | 186 (81.9%)  | 423 (76.4%)  | 215 (57.6%) | 2546 (60.7%) |         |
| Unknown                       | 1053 (19.7%) | 10 (4.4%)    | 41 (7.4%)    | 126 (33.8%) | 876 (20.9%)  |         |
| <b>Histology</b>              |              |              |              |             |              | < 0.001 |
| Adenocarcinoma NOS            | 3653 (68.3%) | 131 (57.7%)  | 327 (59.0%)  | 186 (49.9%) | 3009 (71.8%) |         |
| Mucinous adenocarcinoma       | 82 (1.5%)    | 4 (1.8%)     | 15 (2.7%)    | 4 (1.1%)    | 59 (1.4%)    |         |
| Signet ring cell carcinoma    | 1612 (30.1%) | 92 (40.5%)   | 212 (38.3%)  | 183 (49.1%) | 1125 (26.8%) |         |
| <b>Gastrectomy</b>            |              |              |              |             |              |         |
| Yes                           | 781 (14.6%)  | 227 (100.0%) | 554 (100.0%) | 0 (0.0%)    | 0 (0.0%)     |         |
| Total gastrectomy             | 226 (4.2%)   | 73 (32.2%)   | 153 (27.6%)  | 0 (0.0%)    | 0 (0.0%)     |         |

---

|                       |              |              |              |              |               |
|-----------------------|--------------|--------------|--------------|--------------|---------------|
| surgery               |              |              |              |              |               |
| Non-total             |              |              |              |              |               |
| gastrectomy           | 517 (9.7%)   | 136 (59.9%)  | 381 (68.8%)  | 0 (0.0%)     | 0 (0.0%)      |
| surgery               |              |              |              |              |               |
| Not specified         | 38 (0.7%)    | 18 (7.9%)    | 20 (3.6%)    | 0 (0.0%)     | 0 (0.0%)      |
| No                    | 4566 (85.4%) | 0 (0.0%)     | 0 (0.0%)     | 373 (100.0%) | 4193(100.0%)  |
| <b>Metastasectomy</b> |              |              |              |              |               |
| Yes                   | 600 (11.2%)  | 227 (100.0%) | 0 (0.0%)     | 373 (100.0%) | 0 (0.0%)      |
| No                    | 4747 (88.8%) | 0 (0.0%)     | 554 (100.0%) | 0 (0.0%)     | 4193 (100.0%) |

---

Abbreviation: SPM, surgeries to both primary and metastatic tumors; GO, gastrectomy only; MO, metastasectomy only; NS, no surgery; SEER, Surveillance, Epidemiology, and End Results; NOS, not otherwise specified.
